# Supplementary material for: Residual stresses in adhesively bonded wood determined by a bilayer flexion reporter system
Source: Springer Nature journal article supplement (doi:10.1007/s00226-022-01402-0), 2022-08-25
Supplement: MOESM1 [file 23405824]

# Electronic Supplementary Material for “Residual stresses in adhesively bonded wood determined by a bilayer flexion reporter system”

Jonas Matthias Maas<sup>1\*</sup>, Phillipe Grönquist<sup>2</sup>, Jennifer Furrer<sup>1</sup>, Vanessa Studer<sup>1</sup>, Anselmo Malveti<sup>1</sup>, Markus Rüggeberg<sup>1,3</sup> and Falk K. Wittel<sup>1</sup>

<sup>1\*</sup>ETH Zurich, Institute for Building Materials,  
Leopold-Ruzicka-Weg 4, 8093 Zürich, Switzerland.

<sup>2</sup>ETH Zurich, Institute of Structural Engineering – Timber Structures, Stefano-Franscini-Platz 5, 8093 Zürich, Switzerland.

<sup>3</sup>TU Dresden, Institute of Forest Utilization and Forest Technology, Piennner Straße 19, 01037 Tharandt, Germany.

\*Corresponding author(s). E-mail(s): [jomaas@ethz.ch](mailto:jomaas@ethz.ch);  
Contributing authors: [groenquist@ibk.baug.ethz.ch](mailto:groenquist@ibk.baug.ethz.ch);  
[jennifer.furrer@alumni.ethz.ch](mailto:jennifer.furrer@alumni.ethz.ch); [V.Studer@htb-ag.ch](mailto:V.Studer@htb-ag.ch);  
[manselmo@student.ethz.ch](mailto:manselmo@student.ethz.ch); [markus.rueggeberg@tu-dresden.de](mailto:markus.rueggeberg@tu-dresden.de);  
[fwittel@ethz.ch](mailto:fwittel@ethz.ch);

## Abstract

This electronic supplementary material contains photos of the experimental setup, a verification of the moisture content of the adhesive in the FEM simulation, and tables of the material parameters utilized in the simulation models related to the paper “Residual stresses in adhesively bonded wood determined by a bilayer flexion reporter system”.

**Keywords:** residual stresses, hygro-elastic behavior, bilayer, adhesive bonding , cross-laminated timber

## A Photos of the experimental setup

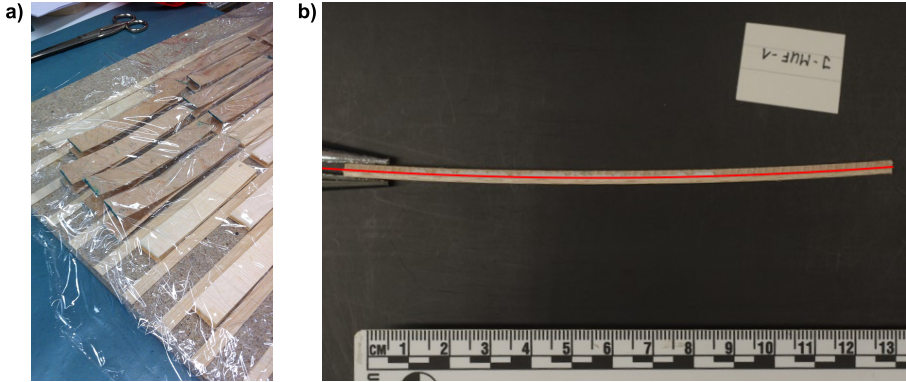

**Figure S1** Photos of the bilayer experiments. a) Bilayer preparation. The wooden layers are sealed with plastic foil and adjusted with guiding rails. b) Measurement of the bilayer curvature. Curvature is obtained by fitting a second order polynomial onto the deformation obtained by image analysis (red line).

## B Verification of the adhesive's moisture content

To simulate the moisture field in Abaqus, an equivalency between the Fourier equation  $(\rho c_T)\partial T/\partial t = \nabla \cdot (\mathbf{K}\nabla T)$  and Fick's law of diffusion  $\partial \omega/\partial t = \nabla \cdot (\mathbf{D}\nabla \omega)$  with respect to the moisture content  $\omega$  is assumed by setting  $(\rho c_T) = 1$ .  $\rho$  is the dry density,  $c_T$  the specific heat,  $T$  the temperature,  $t$  the time,  $\mathbf{K}$  the conductivity matrix and  $\mathbf{D}$  the diffusion matrix.

This assumption leads to the fact that both, the wood's and the adhesive's moisture content, are simulated with respect to the same density. For considering the correct amount of water that the adhesive induces into the wood, this means that the adhesive's moisture content will not be described by its "real" moisture content, but as a theoretical value in respect to the wood density. Experimentally, the weight loss between applying the liquid adhesive and reaching equilibrium at a 65%/20°C climate is measured. This weight loss  $m_{\text{loss}}$  equals the amount of water the adhesive releases into the bilayer above its equilibrium moisture content  $\omega_{\text{adh,eq}}^{\text{equib}}$  at 65%/20°C. The effective initial moisture content of the adhesive  $\omega_{\text{adh,init}}$  can then be described with respect to the wood density in the FEM model, following Eq. 3 of the paper, as

$$\omega_{\text{adh,init}} = \omega_{\text{adh,eq}}^{\text{equib}} + \frac{m_{\text{loss}}}{m_{\text{wood,dry}}/V_{\text{wood,fem}} \cdot V_{\text{adh,fem}}}, \quad (\text{S1})$$

where  $m_{\text{wood,dry}}$  is the experimental oven dry mass,  $V_{\text{wood,fem}}$  the FEM volume of both wooden layers and  $V_{\text{adh,fem}}$  denotes the FEM volume of the adhesive layer. The influence of the initial moisture content is crucial for the response of the FEM model. Therefore, the initial moisture contents are verified for all wood-adhesive combinations of the bilayer, namely beech/MUF, beech/PRF, spruce/MUF and spruce/PRF.

The verification is done by transient simulations, where the calculated initial moisture content is applied to the adhesive. The moisture transport to and from the environment is suppressed and the moisture content equilibrating over the whole domain is measured. This moisture content is compared to the experimental average moisture content of the

**Table S1** Equilibrated average moisture content of the bilayers from (a) experimental data with original bilayer mass balance, (b) experimental data respecting that adhesive density and wood density are equalized in the numerical model by using a corrected mass balance and (c) simulated data.

| Wood/adhesive | Initial moisture adhesive [%] | Average moisture content equilibrium [%] |                |               |
|---------------|-------------------------------|------------------------------------------|----------------|---------------|
|               |                               | Orig. mass (a)                           | Corr. mass (b) | Simulated (c) |
| Spruce/MUF    | 325.42                        | 20.83                                    | 22.55          | 21.84         |
| Spruce/PRF    | 163.31                        | 16.65                                    | 17.44          | 16.70         |
| Beech/MUF     | 205.67                        | 17.44                                    | 18.22          | 17.88         |
| Beech/PRF     | 78.81                         | 13.85                                    | 14.02          | 13.85         |

bilayer, determined from the mass balances, directly after releasing the pressure of the gluing process. Since the FEM model does not respect the adhesive's dry mass correctly, a corresponding correction of the experimental masses is considered as well. The solutions are shown in Table S1. The equilibrating average moisture content over the bilayer in the FEM simulation lies always between the experimental average moisture content without and with mass correction and shows a good agreement with the experimental data.

## C Involved parameters

**Table S2** Mean and standard deviation of the experimental physical properties of the wood layers at 65%/20°C climate. The Young’s moduli and swelling coefficients are measured in radial (R) direction for the active layers and in longitudinal (L) direction for the passive layers. The swelling coefficients are measured between 65% to 85% and 85% to 95% RH.

| Material | Parameter             |                      | Passive layer (L)  | Active layer (R)  |
|----------|-----------------------|----------------------|--------------------|-------------------|
| Beech    | Density               | [kg/m <sup>3</sup> ] | 725.93 ± 22.89     | 754.11 ± 9.27     |
|          | Moisture content      | [%]                  | 11.73 ± 0.18       | 11.61 ± 0.13      |
|          | Young’s modulus       | [MPa]                | 17894.38 ± 1049.85 | 1654.79 ± 86.87   |
|          | Swell. coeff. 65%–85% | [1/%]                | 0.00016 ± 0.00020  | 0.00203 ± 0.00005 |
|          | Swell. coeff. 85%–95% | [1/%]                | 0.00046 ± 0.00010  | 0.00247 ± 0.00013 |
| Spruce   | Density               | [kg/m <sup>3</sup> ] | 456.53 ± 19.90     | 435.48 ± 7.36     |
|          | Moisture content      | [%]                  | 11.60 ± 0.44       | 12.07 ± 0.37      |
|          | Young’s modulus       | [MPa]                | 14530.8 ± 1433.00  | 961.30 ± 106.10   |
|          | Swell. coeff. 65%–85% | [1/%]                | 0.00021 ± 0.00006  | 0.00093 ± 0.00004 |
|          | Swell. coeff. 85%–95% | [1/%]                | 0.00036 ± 0.00004  | 0.00142 ± 0.00005 |

**Table S3** Moisture dependent elasticity parameters for European beech (Hering et al., 2012) and Norway spruce (Neuhaus, 1981; Gereke, 2009). The parameters are taken from Hassani et al. (2015). Moisture dependence of each parameter  $P$  is respected in the form  $P_b(\omega^*) = b_0 + b_1\omega^*$  for beech and  $P_s(\omega^*) = s_0 + s_1\omega^* + s_2\omega^{*2} + s_3\omega^{*3}$  for spruce.  $\omega^* = \omega$ [%].

| Parameter  |                     | Beech   |        | Spruce   |       |        |          |
|------------|---------------------|---------|--------|----------|-------|--------|----------|
|            |                     | $b_0$   | $b_1$  | $s_0$    | $s_1$ | $s_2$  | $s_3$    |
| $E_R$      | [MPa]               | 2565.6  | -59.7  | 999.64   | 3.61  | -2.09  | 0.0467   |
| $E_T$      | [MPa]               | 885.4   | -23.4  | 506.08   | 5.0   | -1.35  | 0.0297   |
| $E_L$      | [MPa]               | 17136.7 | -282.4 | 12791.75 | 15.22 | -9.01  | 0.1885   |
| $G_{RT}$   | [MPa]               | 667.8   | -15.19 | 61.33    | -1.07 | -0.06  | 0.0017   |
| $G_{RL}$   | [MPa]               | 1482    | -15.26 | 762.8    | 5.93  | -1.99  | 0.0477   |
| $G_{TL}$   | [MPa]               | 1100    | -17.72 | 880.75   | 1.39  | -1.39  | 0.0277   |
| $\nu_{TR}$ | [10 <sup>-3</sup> ] | 293.3   | -1.012 | 153.4    | 10.8  | 0.398  | -0.0191  |
| $\nu_{LR}$ | [10 <sup>-3</sup> ] | 383.0   | -8.722 | 232.0    | -8.6  | 2.8784 | -0.07862 |
| $\nu_{LT}$ | [10 <sup>-3</sup> ] | 336.8   | -9.071 | 285.7    | -41.0 | 7.1907 | -0.1642  |

**Table S4** Moisture dependent isotropic Young's moduli  $E_{\text{adh}}$  for MUF, PRF, and PUR (Kläusler et al., 2013). The parameters are taken from Hassani et al. (2016). Moisture dependence is respected in the form  $E_{\text{adh}}(\omega^*) = a_0 + a_1\omega^* + a_2\omega^{*2} + a_3\omega^{*3}$  with  $\omega^* = \omega[\%]$ .  $\nu_{\text{adh}} = 0.3$  for MUF, PRF, and PUR.

| Parameter        |       | $a_0$   | $a_1$  | $a_2$    | $a_3$ |
|------------------|-------|---------|--------|----------|-------|
| $E_{\text{MUF}}$ | [MPa] | 2565.6  | -59.7  | 999.64   | 3.61  |
| $E_{\text{PRF}}$ | [MPa] | 885.4   | -23.4  | 506.08   | 5.0   |
| $E_{\text{PUR}}$ | [MPa] | 17136.7 | -282.4 | 12791.75 | 15.22 |

**Table S5** Moisture dependent diffusion coefficients for European beech (Hering, 2011) and Norway spruce (Saft and Kaliske, 2011). The parameters are taken from Hassani et al. (2015). The diffusion coefficients in each direction  $i$  is calculated as  $D_i(\omega) = D_{i0}e^{\alpha_{i0}\omega}$ .

| Material | Direction    | $D_{i0}$ [mm <sup>2</sup> /h] | $\alpha_{i0}$ [-] |
|----------|--------------|-------------------------------|-------------------|
| Beech    | Radial       | 0.02630                       | 0.199724          |
|          | Tangential   | 0.00370                       | 0.265280          |
|          | Longitudinal | 21.8999                       | -0.038545         |
| Spruce   | Radial       | 0.288                         | 4                 |
|          | Tangential   | 0.288                         | 4                 |
|          | Longitudinal | 0.720                         | 4                 |

**Table S6** Moisture dependent diffusion coefficients for MUF, PRF, and PUR (Volkmer et al., 2012; Wimmer et al., 2013). The parameters are taken from Hassani et al. (2016). The diffusion coefficients are isotropic and calculated as  $D_{\text{adh}}(\omega) = D_0e^{\alpha_0\omega}$ .

| Material | $D_0$ [mm <sup>2</sup> /h] | $\alpha_0$ [-] |
|----------|----------------------------|----------------|
| MUF      | $9.792 \cdot 10^{-4}$      | 0.231          |
| PRF      | $4.047 \cdot 10^{-4}$      | 0.231          |
| PUR      | $3.067 \cdot 10^{-3}$      | 0.057          |

**Table S7** Swelling coefficients  $\alpha_i$  for European beech (Hering, 2011) and Norway spruce (Neuhaus, 1981; Gereke, 2009) in direction  $i$ . The parameters are taken from Hassani et al. (2015).

| Swelling coefficient |       | Beech   | Spruce  |
|----------------------|-------|---------|---------|
| $\alpha_{\text{R}}$  | [1/%] | 0.00191 | 0.00170 |
| $\alpha_{\text{T}}$  | [1/%] | 0.00462 | 0.00330 |
| $\alpha_{\text{L}}$  | [1/%] | 0.00011 | 0.00005 |

## References

- Gereke, T. 2009. *Moisture-induced stresses in cross-laminated wood panels*. Ph. D. thesis, ETH Zurich.
- Hassani, M.M., F.K. Wittel, S. Ammann, P. Niemz, and H.J. Herrmann. 2016. Moisture-induced damage evolution in laminated beech. *Wood Science and Technology* 50(5): 917–940. <https://doi.org/10.1007/s00226-016-0821-5> .
- Hassani, M.M., F.K. Wittel, S. Hering, and H.J. Herrmann. 2015. Rheological model for wood. *Computer Methods in Applied Mechanics and Engineering* 283: 1032–1060. <https://doi.org/10.1016/j.cma.2014.10.031> .
- Hering, S. 2011. *Charakterisierung und Modellierung der Materialeigenschaften von Rotbuchenholz zur Simulation von Holzverklebungen [Characterisation and modelling of the material properties of European beech wood for the simulation of adhesive joints of wood]*. Doctoral Thesis, ETH Zurich.
- Hering, S., D. Keunecke, and P. Niemz. 2012, September. Moisture-dependent orthotropic elasticity of beech wood. *Wood Sci Technol* 46(5): 927–938. <https://doi.org/10.1007/s00226-011-0449-4> .
- Kläusler, O., S. Clauß, L. Lübke, J. Trachsel, and P. Niemz. 2013, July. Influence of moisture on stress–strain behaviour of adhesives used for structural bonding of wood. *Int J Adhes Adhes* 44: 57–65. <https://doi.org/10.1016/j.ijadhadh.2013.01.015> .
- Neuhaus, F.H. 1981. *Elastizitätszahlen von Fichtenholz in Abhängigkeit von der Holzfeuchtigkeit [Elasticity numbers of spruce wood in dependence of its moisture content]*. Dissertation, Ruhr-Universität Bochum.
- Saft, S. and M. Kaliske. 2011, December. Numerical simulation of the ductile failure of mechanically and moisture loaded wooden structures. *Computers & Structures* 89(23-24): 2460–2470. <https://doi.org/10.1016/j.compstruc.2011.06.004> .
- Volkmer, T., J.A. Schmidt, K. Kranitz, and P. Niemz. 2012, April. Studies on the influence of the type of adhesive on the diffusion resistance of wood adhesives. *Bauphysik* 34(2): 55–60. <https://doi.org/10.1002/bapi.201200006> .
- Wimmer, R., O. Kläusler, and P. Niemz. 2013. Water sorption mechanisms of commercial wood adhesive films. *Wood Science and Technology* 47: 763–775. <https://doi.org/10.1007/s00226-013-0538-7> .
